1 **Social and Polygenic Risk Factors for Time to Comorbid Diagnoses in Individuals**  
2 **with Substance Use Disorders: A Phenome-Wide Survival Analysis**

3 Peter B. Barr <sup>a-d</sup>, Zoe E. Neale <sup>a,b,d</sup>, Tim B. Bigdeli <sup>a,b,d,e</sup>, Chris Chatzinakos <sup>a,b</sup>,  
4 Philip D. Harvey <sup>f,g</sup>, Roseann E. Peterson <sup>a,b</sup>, and Jacquelyn L. Meyers <sup>a,b,e</sup>

5 <sup>a</sup> SUNY Downstate Health Sciences University, Department of Psychiatry and Behavioral Sciences

6 <sup>b</sup> SUNY Downstate Health Sciences University, Institute for Genomics in Health

7 <sup>c</sup> SUNY Downstate Health Sciences University, Department of Community Health Sciences

8 <sup>d</sup> VA New York Harbor Healthcare System

9 <sup>e</sup> SUNY Downstate Health Sciences University, Department of Epidemiology and Biostatistics

10 <sup>f</sup> University of Miami Miller School of Medicine

11 <sup>g</sup> Research Service, Bruce W. Carter Miami Veterans Affairs (VA) Medical Center

12

13 Corresponding author: Peter B. Barr

14 450 Clarkson Ave, MSC 1203, Brooklyn, NY 11203

15 e-mail: [peter.barr@downstate.edu](mailto:peter.barr@downstate.edu).

## 16 **ABSTRACT**

17 **Importance:** Persons with substance use disorders (SUD) often suffer from additional comorbidities,  
18 including psychiatric conditions and physical health problems. Researchers have explored this overlap  
19 in electronic health records (EHR) using phenome wide association studies (PheWAS) to characterize  
20 how different indicators are related to all conditions in an individual's EHR. However, analyses have been  
21 largely cross-sectional in nature.

22 **Objective:** To characterize whether various social and genetic risk factors are associated with time to  
23 comorbid diagnoses in electronic health records (EHR) after the first diagnosis of SUD.

24 **Design:** Leveraging those with EHR and whole-genome sequencing data in All of Us (N = 287,012), we  
25 explored whether social determinants of health are associated with lifetime risk of SUD. Next, within those  
26 with a diagnosed SUD (N = 17,460), we examined whether polygenic scores (PGS) were associated with  
27 time to comorbid diagnoses performing a phenome-wide survival analysis.

28 **Setting:** Participating health care organizations across the United States.

29 **Participants:** Participants in the All of Us Research Program with available EHR and genomic data,

30 **Exposures:** Social determinants of health and polygenic scores (PGS) for psychiatric and substance use  
31 disorders,

32 **Main Outcomes and Measures:** Phecodes for diagnoses derived from International Statistical  
33 Classification of Diseases, Ninth and Tenth Revisions, Clinical Modification, codes from EHR.

34 **Results:** Multiple social and demographic risk factors were associated with lifetime SUD diagnosis. Most  
35 strikingly, those reporting an annual income <\$10K had 4.5 times the odds of having an SUD diagnosis  
36 compared to those reporting \$100-\$150K annually (OR = 4.48, 95% CI = 4.01, 5.01). PGSs for alcohol  
37 use disorders, schizophrenia, and post-traumatic stress disorder were associated with time to their  
38 respective diagnoses ( $HR_{AUD} = 1.10$ , 95% CI = 1.06, 1.14;  $HR_{SCZ} = 1.13$ , 95% CI = 1.06, 1.20;  $HR_{PTSD} =$   
39  $1.15$ , 95% CI = 1.08, 1.22). A PGS for ever-smoking was associated with time to subsequent smoking  
40 related comorbidities and additional SUD diagnoses ( $HR_{SMOK} = 1.6$  to 1.16).

41 **Conclusions and Relevance:** Social determinants, especially those related to income have profound  
42 associations with lifetime SUD risk. Additionally, PGS may include information related to outcomes above  
43 and beyond lifetime risk, including timing and severity.

## 44 INTRODUCTION

45 Psychiatric disorders have far-reaching consequences for affected individuals, their families,  
46 communities, and the broader society<sup>1-4</sup>. Substance use disorders (SUD) in particular are extremely  
47 detrimental. An estimated 107,000 Americans died as the result of an overdose in 2021<sup>5</sup>. In 2016, alcohol  
48 use contributed 4.2% to the global disease burden and other drug use contributed 1.3%<sup>4</sup>. Excessive  
49 alcohol use and illicit drug use cost the United States an annual \$250 billion<sup>6</sup> and \$190 billion<sup>7</sup>  
50 respectively. Given the substantial human and economic costs of substance use disorders,  
51 understanding the ways these can contribute to risk for comorbidity has important public health  
52 implications.

53 The proliferation of large-scale biobanks – such as The Million Veteran Program<sup>8</sup>, FinnGen<sup>9</sup>,  
54 Biobank Japan<sup>10</sup>, UK Biobank<sup>11</sup>, and more recently, All of Us<sup>12</sup> – linking individual-level genomic data with  
55 electronic health records (EHRs) presents opportunities to further explore the relationships between  
56 SUD, or any contributory indicators (e.g., clinical diagnoses, polygenic scores), and a wide range of  
57 outcomes. This hypothesis-free approach, referred to as a phenome-wide association study (PheWAS)<sup>10</sup>,  
58 can aid us in better understanding patterns of comorbidity. Recent PheWAS using polygenic scores  
59 (PGS) have identified widespread associations between PGSs and a host of psychiatric and other  
60 medical diagnoses<sup>11-13</sup> spanning all bodily systems (e.g., suicidal thoughts and behaviors, drug induced  
61 psychosis, viral hepatitis, etc.) and have significant potential implications for public health strategies.

62 However, previous PheWAS have primarily used cross-sectional data among populations most  
63 similar to European reference panels. In the current study, we move beyond the focus of lifetime  
64 diagnosis in PheWAS to characterize whether different aspects of genetic risk, in the form of PGS, are  
65 associated with time to appearance of comorbid diagnoses in the EHR after the first indication of SUD.  
66 We do so by utilizing longitudinal EHR data from the *All of Us* Research Program, which is more  
67 demographically inclusive, including Black/African-American (34%) and Hispanic or Latino/a/x (15%)  
68 participants, than previous work in this area. Harnessing the longitudinal quality of the All of Us Research  
69 Programs' EHR data, we explored whether: 1) social determinants of health were associated with lifetime

70 risk of SUD and 2) PGSs for psychiatric and substance use disorders were associated with the onset of  
71 comorbidities post-SUD diagnosis, by performing a phenome-wide survival analysis. Our analyses inform  
72 the degree to which genetic and environmental risk factors are important in the course of SUD related  
73 medical problems (e.g., suicidal thoughts and behaviors, drug induced psychosis, viral hepatitis, etc.).

74 The clinical utility of PGSs is an ongoing area of debate <sup>13-18</sup>. In the current analysis, we add to  
75 the discussion by exploring the potential use of polygenic scores within individuals who are already  
76 diagnosed. We move beyond a focus of lifetime associations in PheWAS to characterize whether different  
77 elements of genetic risk, in the form of polygenic scores, are associated with onset of comorbid diagnoses  
78 appearing in the EHR after the first record entry of substance use disorder (SUD). Exploring the influence  
79 of polygenic scores for SUD and other co-occurring psychiatric and medical diagnoses or traits can help  
80 characterize the vast pleiotropic impact of genetic risk for SUD, which could reflect shared genetic effects  
81 (biological pleiotropy, e.g., a common liability contributes to risk for both SUD and PTSD, explaining the  
82 comorbidity) or a causal chain of events (mediated pleiotropy, e.g., liability for AUD contributes to  
83 increased alcohol use, resulting in liver disease). Knowledge gained regarding the potential medical  
84 complications likely to arise in individuals with SUD with and without genetic risk for SUD can lead to  
85 preventative actions or interventions that may reduce the onset of these additional comorbidities. Lastly,  
86 we integrated social and genomic data in our analyses given the importance of social and clinical  
87 determinants of health in SUD<sup>19</sup>.

## 88 **METHODS**

### 89 *The All of Us (AoU) Research Program*

90 All of Us is a prospective, nationwide cohort study aiming to study the effects of environment,  
91 lifestyle, and genomics on health outcomes. Participant recruitment is predominantly done through  
92 participating health care provider organizations and in partnership with Federally Qualified Health  
93 Centers. Interested participants can enroll as direct volunteers, visiting community-based enrollment  
94 sites. Enrollment, informed consent, and baseline health surveys are administrated digitally through the

95 All of Us program website (<https://joinallofus.org>)<sup>20</sup>. Participants are then invited to undergo a basic  
96 physical exam and biospecimen collection at an affiliated healthcare site. There are two types of  
97 participant follow-up: passive via linkage with EHR and active by periodic follow-up surveys. We included  
98 the full sample for associations between social risk factors and lifetime SUD diagnosis (N = 287,079).  
99 For the genomic analyses, we included all participants who had electronic health record (EHR) and short-  
100 read whole genome sequence (WGS) data from release 7 (May 6, 2018 to February 23, 2023).  
101 Additionally, we excluded those with self-reported military service to remove potential overlap in current  
102 genome wide association studies (GWAS) such as the Million Veteran Program (MVP), leaving the final  
103 sample with a lifetime SUD and genomic data at N = 12,831.

#### 104 *Genotyping*

105 Approximately 245,000 individuals in the current release of AoU have available short-read  
106 sequencing data. To ensure consistency across sites for DNA extraction and sequencing, AoU developed  
107 a standardized process and QC metrics across sites. Sequencing was performed on the Illumina  
108 NovaSeq 6000 instrument. A full description of the collection, harmonization, sequencing, and population  
109 assignment pipeline has been published elsewhere<sup>21</sup>. To adjust for population structure in genetic  
110 analyses, participants were assigned to genetic similarity clusters of those most similar to European  
111 reference panels (EUR-like) and those most similar to African reference panels (AFR-like)<sup>22</sup>. Genetic  
112 principal components (PCs) were generated using the *hwe\_normalized\_pca* in Hail<sup>23</sup>.

#### 113 *Electronic health records (EHRs)*

114 We used phecodes, which are clusters of ICD-9/10-CM codes in the EHR<sup>24,25</sup>, validated previously  
115 <sup>26,27</sup>, to create lifetime diagnoses for SUD as well as the main outcomes for the PheWAS. For lifetime  
116 SUD diagnosis, we considered individuals as meeting criteria for an SUD if they had two or more  
117 outpatient or one inpatient occurrence of phecodes 316 (Substance addiction and disorders) or 317  
118 (Alcohol-related disorders) in their EHR. Prior analyses have shown that 2 or more phecodes is a good  
119 predictor of diagnosis<sup>28,29</sup>. We focus exclusively on those with diagnoses of alcohol and drug-related

120 disorders, excluding tobacco use disorders. Alcohol and other drug use disorders have the strongest  
121 evidence of a common etiology<sup>30,31</sup>, and this shared risk only overlaps minimally with risk for tobacco  
122 related disorders<sup>32</sup>. For PheWAS outcomes, we used the presence of any phecode following the initial  
123 diagnosis of SUD. We excluded phecodes for which there were fewer than 50 individuals that met criteria  
124 for a diagnosis.

### 125 *Social and demographic risk factors*

126 We included a variety of social and demographic measures available from the baseline AoU  
127 survey. For the current analysis we included age, gender (man, woman, transgender/non-binary), race-  
128 ethnicity (Non-Hispanic White, Black/African-American, Hispanic or Latino/a/x, Asian American/Pacific  
129 Islander, Multi-racial, and other race-ethnicity), education (less than high school, HS diploma or GED,  
130 some college, college graduate, and advanced degree), household income (less than \$10k to more than  
131 \$200k), marital status (never married, married, cohabitating, divorced, separated, and widowed), health  
132 insurance (have vs not), and place of birth (US born vs foreign born). We focused on the association  
133 between social risk factors and lifetime SUD diagnosis, only. Because these items are measured at  
134 baseline entry into AoU and not necessarily time of SUD diagnoses, we lack the ability to establish  
135 whether potentially time-variant measures were the same before their first SUD diagnosis.

### 136 *Polygenic scores (PGS)*

137 We estimated PGSs, which are aggregate measures of the number of risk alleles individuals carry  
138 weighted by effect sizes from GWAS summary statistics, from multiple large-scale GWASs<sup>33-38</sup>  
139 (Supplemental Table S1). We included these specific PGSs because: 1) there is strong genetic overlap  
140 between psychiatric and substance use disorders<sup>34-36,38-40</sup>, and 2) each of these GWAS included results  
141 for AFR-like participants, allowing us to move beyond EUR-like only analyses. We created PGSs using  
142 PRS-CSx<sup>41</sup>, a Bayesian regression and continuous shrinkage method that estimates the posterior effect  
143 sizes for each SNP in a given set of GWAS summary statistics. PGS accuracy decays continuously as  
144 target samples differ in ancestral background from the discovery GWAS, even within relatively

145 homogenous genetic clusters<sup>42</sup> . PRS-CSx uses inputs from multiple genomic similarity clusters to  
146 improve power of PGS in underpowered samples, typically those who are not in the EUR-like groups.  
147 We standardized all PGSs to Z-scores.

148 We note that our paper includes language related to both race-ethnicity, which reflects socially-  
149 constructed categories, and genetic similarity, which uses empirical assignment based on available  
150 reference panels, because both are relevant for the current analyses. First, prior work has established  
151 race-ethnicity (and with it, racism and discrimination) are relevant for disparities in SUDs<sup>43–47</sup>. Second,  
152 informed by best practices for current approaches to handling genetic data from diverse populations<sup>48</sup>,  
153 we stratified analyses by genetic similarity and included genetic principal components, which limit the  
154 possibility of false positives due to population stratification. The inclusion of both concepts is in no way  
155 endorsing the notion that these reflect discrete biological categories.

#### 156 *Analytic plan*

157 First, we examined the association between social, demographic, and genetic measures and  
158 lifetime SUD diagnosis using logistic regression. Next, we expanded on the traditional PheWAS approach  
159 by performing a phenome wide survival analysis. Rather than focusing on lifetime diagnosis, as is the  
160 case in the typical PheWAS approach, we utilized Cox proportional hazards models to estimate the  
161 association (in the form of hazard ratios, or HR) between time from SUD diagnosis to first documented  
162 phecode diagnosis. In survival analysis, the hazard ratio (HR) is a measure used to compare the risk of  
163 an event occurring at any given point in time. A HR greater than 1 indicates an increased risk of the  
164 event, while a HR less than 1 suggests a reduced risk. For example, if the HR for a PGS is 1.5, it suggests  
165 that they are 1.5 times more likely to experience the comorbidity earlier for every one unit increase in  
166 PGS. We included the earliest diagnosis for each EHR code. In the PGS models, we stratified by genetic  
167 similarity grouping (AFR-like and EUR-like) and included age at SUD diagnosis, gender, and the first 10  
168 genetic principal components as covariates. We performed all survival models using the *survival* package  
169 (version 3.7.0) in R. Finally, we meta-analyzed results via fixed-effects meta-analysis in the *meta* package  
170 (version 7.0.0) in R. To correct for multiple testing, we applied a false discovery rate (FDR)<sup>49</sup> of 5%.



## 171 RESULTS

### 172 *Defining persons with lifetime SUD in EHR*

173 Using the 2+ outpatient/1+ inpatient definition of substance use disorder diagnosis, we identified  
174 N = 17,460 individuals who met our criteria for a lifetime SUD (excluding nicotine/tobacco use disorders  
175 and those who reported active duty military service). Demographic characteristics for the full sample with  
176 available EHR data and those who met our criteria for SUD are presented in Table 1. Relative to the full  
177 sample, the SUD group was more likely to be younger, men, born in the United States, and identify as  
178 Black/African-American. This demographic breakdown of the SUD sample largely reflects the patterns  
179 seen in nationally representative samples<sup>43,44</sup>.

### 180 *Social and Demographic results*

181 Figure 1 presents the results from the multivariable logistic regression model examining the  
182 association between social and demographic risk factors and lifetime SUD diagnosis in the full phenotypic  
183 sample (N = 287,079). These results largely mimicked prior analyses in earlier versions of the AoU data  
184<sup>50</sup>, whereby there was a stark gradient in lifetime SUD diagnosis across education and income, and those  
185 with the lowest income (OR = 4.482; CI = 4.013, 5.006) and education (OR = 3.085; CI = 2.883, 3.302)  
186 were at greatest risk for diagnosis. Additionally, women (OR = 0.618; CI = 0.598, 0.639), transgender  
187 and non-binary participants (OR = 0.700; CI = 0.585, 0.838), and those born outside of the US (OR =  
188 0.388; CI = 0.361, 0.418) all had lower odds of a lifetime diagnosis. Relative to non-Hispanic White  
189 participants, all other racial-ethnic groups were at lower risk. Interestingly, though the base rates of  
190 lifetime SUD diagnosis for Black/African-American participants were higher than others, this relationship  
191 was reversed after accounting for the other social factors (OR = 0.856; CI = 0.821, 0.892). The full results  
192 are available in Supplemental Table S2.

### 193 *PGS Survival PheWAS*

194 Moving from the full sample to those with an SUD diagnosis only, we further constrained to those  
195 of AFR-like and EUR-like genetic similarity for subsequent within-SUD survival models using PGSs (N =

196 12,831, see Supplemental Table S3 for stratified results). Figure 2 present the distribution of HRs for  
197 each of the PGSs, highlighting the varying magnitude of effects sizes. Associations between each PGS  
198 and phecodes were enriched for *reduced* time to corresponding diagnoses. After adjusting for multiple  
199 testing, only 19 of the associations remained significant (Table 2, see Supplemental Table S4 for full  
200 results). Of all the PGSs, the PGS for lifetime smoking initiation (SMOK) showed the greatest number of  
201 trait associations, the strongest being with chronic airway obstruction (HR =1.163; CI = 1.108, 1.220),  
202 emphysema (HR = 1.140; CI = 1.061, 1.226), congestive heart failure NOS (HR = 1.140; CI = 1.070,  
203 1.214), and viral hepatitis C (HR = 1.124; CI = 1.065, 1.186). Importantly, PGSs for SCZ, PTSD, and  
204 AUD were associated with time to SCZ (HR = 1.126; CI = 1.060, 1.195), PTSD (HR = 1.147; CI = 1.082,  
205 1.217), and AUD (HR = 1.103; CI = 1.064, 1.142), respectively.

206 Figure 3 presents two of the top associations between the SMOK PGS and time to subsequent  
207 chronic airway obstruction and viral hepatitis C codes. Here PGSs were stratified by standard deviations  
208 (SD), ranging from -2 SD (red) to +2 SD (purple). While the overall effect of the PGSs was small, by the  
209 end of observation, the difference in probability of “survival” between these two extremes was  
210 approximately 15% lower for chronic airway obstruction and 10% lower for viral hepatitis C in the +2 SD  
211 group.

## 212 **DISCUSSION**

213 Large-scale biobanks and genetic data are becoming increasingly prevalent in health research,  
214 offering the potential to explore multiple comorbidities simultaneously. The goal of precision medicine is  
215 to realize the potential of harnessing these sources of information from to personalize treatment and  
216 stratify risk. However, much of the work to date has focused on lifetime risk for a single diagnosis. In the  
217 current analyses, we expand upon existing research by focusing on risk longitudinally and within persons  
218 who have a SUD diagnosis to begin to understand what value genetic and social risk factors might play  
219 in helping those who already have a diagnosis.

220 We found multiple social and demographic risk factors associated with lifetime SUD diagnosis.  
221 These results largely mimic prior findings in AoU<sup>50</sup> and in the population more broadly<sup>43,44</sup>, whereby those  
222 who largely occupy marginalized positions are at greater risk for having a SUD. The most striking finding  
223 is the gradient in income, whereby those reporting an annual household income less than \$10k annually  
224 had 4.5 times the odds of having an SUD diagnosis, reflecting either social determinants as risk factors  
225 or the disabling impact of SUD. Importantly the increased rate of diagnosis among those who identify as  
226 Black or African-American reversed after accounting for other social determinants of health, such that  
227 they were at decreased risk relative to Non-Hispanic White participants. This finding suggests the  
228 increased rates of diagnoses in this population may reflect socioeconomic inequalities.

229 Focusing on genetic risk within persons who had a SUD diagnosis, polygenic scores for AUD,  
230 SCZ, and SMOK demonstrated enrichment for a *longer* time to corresponding diagnoses in the EHR.  
231 While this could be interpreted as some type of protective effect, the more likely explanation is those at  
232 greater risk are less likely to treatment<sup>51,52</sup>, especially as barriers to access, such as health insurance  
233 and economic resources, were key predictors in the social demographic correlates. In terms of specific  
234 PGS-phecode associations, several remained significant after correcting for multiple testing, including  
235 associations between PGSs for SCZ, PTSD, and AUD and the time to their corresponding diagnoses.  
236 These results increase confidence that associations are not merely spurious, as these PGSs  
237 demonstrated specificity for the expected outcomes. The results also highlight the potential for assessing  
238 risk in comorbid conditions among those already diagnosed with a SUD. PGS for lifetime smoking  
239 initiation was associated with risk for a variety of smoking-related conditions as well as other correlates  
240 of SUD (e.g. viral hepatitis C). Prior work on externalizing disorders suggests that “ever smoker” is a  
241 strong proxy for externalizing risk<sup>31,53</sup>, offering a glimpse into one potential mechanism linking this PGS  
242 to the comorbid diagnoses.

243 This work has several important limitations. First, we lacked the social and demographic risk  
244 factors measured at time of diagnosis and could not establish the time ordering between these measures.  
245 As the AoU database grows through recruitment, data generation, and passive data collection via

246 constantly updating EHRs, we will be able to explore the prospective association between important  
247 social determinants of health and diagnoses. Second, the use of EHR data, while convenient, is also  
248 confounded by access and healthcare utilization. We cannot discern whether associations are truly  
249 reflective of the progression in disease process or whether they reflect propensity for help seeking when  
250 available in a healthcare setting. Lastly, though we have attempted to be more inclusive in the genetic  
251 analyses, we still lacked sufficient GWAS summary statistics for other genetic similarity groups to include  
252 here. As a field, we must continue to strive to ensure results from genetic discoveries can be applied to  
253 all populations, equitably<sup>48</sup>.

254         Harnessing the longitudinal data in the All of Us database, we have demonstrated the importance  
255 of various social conditions for the lifetime diagnosis of substance use disorders. Annual income is  
256 especially relevant in disparities of SUD. Additionally, we have also shown that in persons who have a  
257 SUD diagnosis, various measures of genetic risk were associated with time to subsequent diagnoses in  
258 their EHR, moving beyond typical cross-sectional approaches. While there is considerable work to be  
259 done for the use of social, clinical, and biological data within a healthcare setting, the current results  
260 demonstrate the potential of these approaches. Future work should endeavor to integrate across levels  
261 of analysis in a longitudinal framework.

## 262 REFERENCES

- 263 1. Ferrari A. Global, regional, and national burden of 12 mental disorders in 204 countries and  
264 territories, 1990–2019: a systematic analysis for the Global Burden of Disease Study 2019. *Lancet*  
265 *Psychiatry*. 2022;9(2):137-150. doi:10.1016/S2215-0366(21)00395-3
- 266 2. Murray CJL, Mokdad AH, Ballestros K, et al. The state of US health, 1990-2016: Burden of  
267 diseases, injuries, and risk factors among US states. *JAMA - Journal of the American Medical*  
268 *Association*. 2018;319(14):1444-1472. doi:10.1001/jama.2018.0158
- 269 3. Reitsma MB, Fullman N, Ng M, et al. Smoking prevalence and attributable disease burden in 195  
270 countries and territories, 1990–2015: a systematic analysis from the Global Burden of Disease  
271 Study 2015. *The Lancet*. 2017;389(10082):1885-1906. doi:[https://doi.org/10.1016/S0140-](https://doi.org/10.1016/S0140-6736(17)30819-X)  
272 [6736\(17\)30819-X](https://doi.org/10.1016/S0140-6736(17)30819-X)
- 273 4. Degenhardt L, Charlson F, Ferrari A, et al. The global burden of disease attributable to alcohol and  
274 drug use in 195 countries and territories, 1990–2016: a systematic analysis for the Global Burden  
275 of Disease Study 2016. *Lancet Psychiatry*. 2018;5(12):987-1012. doi:10.1016/S2215-  
276 [0366\(18\)30337-7](https://doi.org/10.1016/S2215-0366(18)30337-7)
- 277 5. U.S. Overdose Deaths In 2021 Increased Half as Much as in 2020 - But Are Still Up 15%. Accessed  
278 May 15, 2022. [https://www.cdc.gov/nchs/pressroom/nchs\\_press\\_releases/2022/202205.htm](https://www.cdc.gov/nchs/pressroom/nchs_press_releases/2022/202205.htm)
- 279 6. Sacks JJ, Gonzales KR, Bouchery EE, Tomedi LE, Brewer RD. 2010 National and State Costs of  
280 Excessive Alcohol Consumption. *Am J Prev Med*. 2015;49(5):e73-e79.  
281 doi:10.1016/j.amepre.2015.05.031
- 282 7. National Drug Intelligence Center. *National Drug Threat Assessment*. Vol 2019. United States  
283 Department of Justice; 2011.
- 284 8. Gaziano JM, Concato J, Brophy M, et al. Million Veteran Program: A mega-biobank to study  
285 genetic influences on health and disease. *J Clin Epidemiol*. 2016;70:214-223.  
286 doi:10.1016/j.jclinepi.2015.09.016

- 287 9. Kurki MI, Karjalainen J, Palta P, et al. FinnGen provides genetic insights from a well-phenotyped  
288 isolated population. *Nature*. 2023;613(7944):508-518. doi:10.1038/s41586-022-05473-8
- 289 10. Nagai A, Hirata M, Kamatani Y, et al. Overview of the BioBank Japan Project: Study design and  
290 profile. *J Epidemiol*. 2017;27(3):S2-S8. doi:10.1016/j.je.2016.12.005
- 291 11. Bycroft C, Freeman C, Petkova D, et al. The UK Biobank resource with deep phenotyping and  
292 genomic data. *Nature*. 2018;562(7726):203-209. doi:10.1038/s41586-018-0579-z
- 293 12. The All of Us Research Program Investigators. The “All of Us” Research Program. *New England*  
294 *Journal of Medicine*. 2019;381(7):668-676. doi:10.1056/nejmsr1809937
- 295 13. Lewis CM, Vassos E. Polygenic risk scores: From research tools to clinical instruments. *Genome*  
296 *Med*. 2020;12(1):1-11. doi:10.1186/s13073-020-00742-5
- 297 14. Martin AR, Kanai M, Kamatani Y, Okada Y, Neale BM, Daly MJ. Clinical use of current polygenic  
298 risk scores may exacerbate health disparities. *Nat Genet*. 2019;51(4):584-591.  
299 doi:10.1038/s41588-019-0379-x
- 300 15. Wray NR, Lin T, Austin J, et al. From Basic Science to Clinical Application of Polygenic Risk  
301 Scores: A Primer. *JAMA Psychiatry*. 2021;78(1):101-109. doi:10.1001/jamapsychiatry.2020.3049
- 302 16. Torkamani A, Wineinger NE, Topol EJ. The personal and clinical utility of polygenic risk scores.  
303 *Nat Rev Genet*. 2018;19(9):581-590. doi:10.1038/s41576-018-0018-x
- 304 17. Murray GK, Lin T, Austin J, McGrath JJ, Hickie IB, Wray NR. Could Polygenic Risk Scores Be  
305 Useful in Psychiatry?: A Review. *JAMA Psychiatry*. 2021;78(2):210-219.  
306 doi:10.1001/jamapsychiatry.2020.3042
- 307 18. Klarin D, Natarajan P. Clinical utility of polygenic risk scores for coronary artery disease. *Nat Rev*  
308 *Cardiol*. 2022;19(5):291-301. doi:10.1038/s41569-021-00638-w
- 309 19. Barr PB, Driver MN, Kuo SIC, et al. Clinical, environmental, and genetic risk factors for substance  
310 use disorders: characterizing combined effects across multiple cohorts. *Mol Psychiatry*.  
311 2022;27(11):4633-4641. doi:10.1038/s41380-022-01801-6

- 312 20. National Institutes of Health. “All of Us” Research Program. U.S Department of Health and Human  
313 Service- National Institute of Health. 2021. <https://allofus.nih.gov/>
- 314 21. Bick AG, Metcalf GA, Mayo KR, et al. Genomic data in the All of Us Research Program. *Nature*.  
315 2024;627(8003):340-346. doi:10.1038/s41586-023-06957-x
- 316 22. National Academies of Sciences and Medicine E. *Using Population Descriptors in Genetics and*  
317 *Genomics Research: A New Framework for an Evolving Field*. The National Academies Press;  
318 2023. doi:10.17226/26902
- 319 23. Hail Team. Hail 0.2. Accessed December 10, 2024. <https://github.com/hail-is/hail>
- 320 24. Denny JC, Bastarache L, Ritchie MD, et al. Systematic comparison of phenome-wide association  
321 study of electronic medical record data and genome-wide association study data. *Nat Biotechnol*.  
322 2013;31(12):1102-1110. doi:10.1038/nbt.2749
- 323 25. Wu P, Gifford A, Meng X, et al. Mapping ICD-10 and ICD-10-CM codes to phecodes: Workflow  
324 development and initial evaluation. *J Med Internet Res*. 2019;21(11):1-13. doi:10.2196/14325
- 325 26. Wei WQ, Teixeira PL, Mo H, Cronin RM, Warner JL, Denny JC. Combining billing codes, clinical  
326 notes, and medications from electronic health records provides superior phenotyping performance.  
327 *Journal of the American Medical Informatics Association*. 2016;23(e1):20-27.  
328 doi:10.1093/jamia/ocv130
- 329 27. Wei WQ, Bastarache LA, Carroll RJ, et al. Evaluating phecodes, clinical classification software,  
330 and ICD-9-CM codes for phenome-wide association studies in the electronic health record. *PLoS*  
331 *One*. 2017;12(7):e0175508.
- 332 28. Zheutlin AB, Dennis J, Linnér RK, et al. Penetrance and pleiotropy of polygenic risk scores for  
333 schizophrenia in 106,160 patients across four health care systems. *American Journal of*  
334 *Psychiatry*. 2019;176(10):846-855. doi:10.1176/appi.ajp.2019.18091085
- 335 29. Bigdeli TB, Voloudakis G, Barr PB, et al. Penetrance and Pleiotropy of Polygenic Risk Scores for  
336 Schizophrenia, Bipolar Disorder, and Depression among Adults in the US Veterans Affairs Health  
337 Care System. *JAMA Psychiatry*. 2022;79(11):1092-1101. doi:10.1001/jamapsychiatry.2022.2742

- 338 30. Barr PB, Dick DM. The Genetics of Externalizing Problems. *Curr Top Behav Neurosci*. 2020;47:93-  
339 112. doi:10.1007/7854\_2019\_120
- 340 31. Karlsson Linnér R, Mallard TT, Barr PB, et al. Multivariate analysis of 1.5 million people identifies  
341 genetic associations with traits related to self-regulation and addiction. *Nat Neurosci*. Published  
342 online 2021:1-10. doi:10.1038/s41593-021-00908-3
- 343 32. Kendler KS, Myers J. The boundaries of the internalizing and externalizing genetic spectra in men  
344 and women. *Psychol Med*. 2014;44(3):647-655. doi:10.1017/S0033291713000585
- 345 33. Saunders GRB, Wang X, Chen F, et al. Genetic diversity fuels gene discovery for tobacco and  
346 alcohol use. *Nature* 2022 612:7941. 2022;612(7941):720-724. doi:10.1038/s41586-022-05477-4
- 347 34. Levey DF, Stein MB, Wendt FR, et al. Bi-ancestral depression GWAS in the Million Veteran  
348 Program and meta-analysis in >1.2 million individuals highlight new therapeutic directions. *Nat*  
349 *Neurosci*. Published online May 27, 2021. doi:10.1038/s41593-021-00860-2
- 350 35. Levey DF, Galimberti M, Deak JD, et al. Multi-ancestry genome-wide association study of cannabis  
351 use disorder yields insight into disease biology and public health implications. *Nat Genet*.  
352 2023;55(12):2094-2103. doi:10.1038/s41588-023-01563-z
- 353 36. Nievergelt CM, Maihofer AX, Atkinson EG, et al. Genome-wide association analyses identify 95  
354 risk loci and provide insights into the neurobiology of post-traumatic stress disorder. *Nat Genet*.  
355 2024;56(5):792-808. doi:10.1038/s41588-024-01707-9
- 356 37. Kranzler HR, Zhou H, Kember RL, et al. Genome-wide association study of alcohol consumption  
357 and use disorder in 274,424 individuals from multiple populations. *Nat Commun*. 2019;10(1):1499.  
358 doi:10.1038/s41467-019-09480-8
- 359 38. Zhou H, Kember RL, Deak JD, et al. Multi-ancestry study of the genetics of problematic alcohol  
360 use in over 1 million individuals. *Nat Med*. 2023;29(12):3184-3192. doi:10.1038/s41591-023-  
361 02653-5
- 362 39. Deak JD, Zhou H, Galimberti M, et al. Genome-wide association study in individuals of European  
363 and African ancestry and multi-trait analysis of opioid use disorder identifies 19 independent



- 364 genome-wide significant risk loci. *Mol Psychiatry*. 2022;27(10):3970-3979. doi:10.1038/s41380-  
365 022-01709-1
- 366 40. Trubetskoy V, Pardiñas AF, Qi T, et al. Mapping genomic loci implicates genes and synaptic  
367 biology in schizophrenia. *Nature*. 2022;604(7906):502-508. doi:10.1038/s41586-022-04434-5
- 368 41. Ruan Y, Lin YF, Feng YCA, et al. Improving polygenic prediction in ancestrally diverse populations.  
369 *Nat Genet*. 2022;54(5):573-580. doi:10.1038/s41588-022-01054-7
- 370 42. Ding Y, Hou K, Xu Z, et al. Polygenic scoring accuracy varies across the genetic ancestry  
371 continuum. *Nature*. 2023;618(7966):774-781. doi:10.1038/s41586-023-06079-4
- 372 43. Grant BF, Goldstein RB, Saha TD, et al. Epidemiology of DSM-5 alcohol use disorder results from  
373 the national epidemiologic survey on alcohol and related conditions III. *JAMA Psychiatry*.  
374 2015;72(8):757-766. doi:10.1001/jamapsychiatry.2015.0584
- 375 44. Grant BF, Saha TD, June Ruan W, et al. Epidemiology of DSM-5 drug use disorder results from  
376 the national epidemiologic survey on alcohol and related conditions-III. *JAMA Psychiatry*.  
377 2016;73(1):39-47. doi:10.1001/jamapsychiatry.2015.2132
- 378 45. Williams DR. Race, Socioeconomic Status, and Health The Added Effects of Racism and  
379 Discrimination. *Ann N Y Acad Sci*. 1999;896(1):173-188. doi:https://doi.org/10.1111/j.1749-  
380 6632.1999.tb08114.x
- 381 46. Williams DR, Collins C. Racial residential segregation: a fundamental cause of racial disparities in  
382 health. *Public Health Rep*. 2001;116(5):404-416. <http://www.ncbi.nlm.nih.gov/pubmed/12042604>
- 383 47. Williams DR, Mohammed SA. Discrimination and racial disparities in health: evidence and needed  
384 research. *J Behav Med*. 2009;32(1):20-47. doi:10.1007/s10865-008-9185-0
- 385 48. Peterson RE, Kuchenbaecker K, Walters RK, et al. Genome-wide Association Studies in  
386 Ancestrally Diverse Populations: Opportunities, Methods, Pitfalls, and Recommendations. *Cell*.  
387 2019;179(3):589-603. doi:10.1016/j.cell.2019.08.051

- 388 49. Benjamini Y, Hochberg Y. Controlling the False Discovery Rate: A Practical and Powerful  
389 Approach to Multiple Testing. *Journal of the Royal Statistical Society Series B (Methodological)*.  
390 1995;57(1):289-300. <http://www.jstor.org/stable/2346101>
- 391 50. Barr PB, Bigdeli TB, Meyers JL. Prevalence, Comorbidity, and Sociodemographic Correlates of  
392 Psychiatric Diagnoses Reported in the All of Us Research Program. *JAMA Psychiatry*.  
393 2022;79(6):622-628. doi:10.1001/jamapsychiatry.2022.0685
- 394 51. Mojtabai R, Evans-Lacko S, Schomerus G, Thornicroft G. Attitudes Toward Mental Health Help  
395 Seeking as Predictors of Future Help-Seeking Behavior and Use of Mental Health Treatments.  
396 *Psychiatric Services*. 2016;67(6):650-657. doi:10.1176/appi.ps.201500164
- 397 52. Blanco C, Iza M, Rodríguez-Fernández JM, Baca-García E, Wang S, Olfson M. Probability and  
398 predictors of treatment-seeking for substance use disorders in the U.S. *Drug Alcohol Depend*.  
399 2015;149:136-144. doi:<https://doi.org/10.1016/j.drugalcdep.2015.01.031>
- 400 53. Deak JD, Clark DA, Liu M, et al. Alcohol and nicotine polygenic scores are associated with the  
401 development of alcohol and nicotine use problems from adolescence to young adulthood.  
402 *Addiction*. 2022;117(4):1117-1127. doi:10.1111/add.15697
- 403
- 404

405 **ACKNOWLEDGEMENTS**

406 This study was supported in part by National Institute of Mental Health (R01MH125938: Drs Peterson,  
407 Bigdeli, Chatzinakos, and Meyers); the National Institute of Drug Abuse (R01DA050721: Dr Barr;  
408 R01DA060596: Drs Meyers, Barr, Chatzinakos, and Neale), and the National Institute on Alcohol Abuse  
409 and Alcoholism (R01AA030010: Drs Meyers, Barr, Chatzinakos, and Neale). Computing costs associated  
410 with this work was supported by R01MH125938 (PI: Peterson). The content of this article is solely the  
411 responsibility of the authors and does not necessarily represent the official views of the National Institutes  
412 of Health.

413

414 The All of Us Research Program is supported by the National Institutes of Health, Office of the Director:  
415 Regional Medical Centers: 1 OT2 OD026549; 1 OT2 OD026554; 1 OT2 OD026557; 1 OT2 OD026556;  
416 1 OT2 OD026550; 1 OT2 OD 026552; 1 OT2 OD026553; 1 OT2 OD026548; 1 OT2 OD026551; 1 OT2  
417 OD026555; IAA #: AOD 16037; Federally Qualified Health Centers: HHSN 263201600085U; Data and  
418 Research Center: 5 U2C OD023196; Biobank: 1 U24 OD023121; The Participant Center: U24  
419 OD023176; Participant Technology Systems Center: 1 U24 OD023163; Communications and  
420 Engagement: 3 OT2 OD023205; 3 OT2 OD023206; and Community Partners: 1 OT2 OD025277; 3 OT2  
421 OD025315; 1 OT2 OD025337; 1 OT2 OD025276. In addition, the All of Us Research Program would not  
422 be possible without the partnership of its participants.

423 **FIGURE CAPTIONS**

424 *Figure 1: Association results for social risk factors and lifetime SUD diagnosis.*

425 Adjusted odds ratios (OR) and corresponding 95% confidence intervals presented on the x-axis.

426 Reference categories indicated by (ref). Models included each of the above measures, simultaneously.

427 NH = Non-Hispanic, AAPI = Asian American or Pacific Islander, HS = high school, GED = general

428 educational development.

429

430 *Figure 2: Distribution of hazard ratios for PGSs from multivariable survival PheWAS.*

431 Violin and box-and-whisker plots for conditional hazard ratios (HR) between each PGS and phecodes in

432 the meta-analyzed results. All models included each PGS, simultaneously. Thick black line in the center

433 of each box represents the median value. The edges of the box represent the 25<sup>th</sup> and 75<sup>th</sup> percentile.

434 AUD = alcohol use disorder, CUD = cannabis use disorder, DEP = depression, PTSD = post-traumatic

435 stress disorder, SMOK = ever smoker, SCZ = schizophrenia.

436

437 *Figure 3: Survival plots for chronic airway obstruction and viral hepatitis C across SMOK PGS levels.*

438 Predicted survival curves for chronic airway obstruction and viral hepatitis C as a function of SMOK PGS

439 levels (red = -2 SD, yellow = -1 SD, green = mean, blue = +1 SD, purple = +2 SD). All models adjusted

440 for age at diagnosis, gender, genetic similarity, and first 10 genetic principal components (PCS).

**Table 1: Sample Demographics in All of Us participants with available EHR data**

|                                  | Full sample (N = 287, 012) |             | SUD (N = 17,460) |             | $\chi^2$ |
|----------------------------------|----------------------------|-------------|------------------|-------------|----------|
|                                  | <u>N/Mean</u>              | <u>%/SD</u> | <u>N/Mean</u>    | <u>%/SD</u> |          |
| Age (mean)                       | 55.10                      | 0.02        | 51.40            | 0.29        | *        |
| Woman                            | 171,431                    | 59.73       | 8,310            | 47.59       | *        |
| Man                              | 108,209                    | 37.70       | 8,585            | 49.17       | *        |
| Transgender/Non-Binary           | 1,893                      | 0.66        | 142              | 0.81        |          |
| Gay/Lesbian/Bisexual             | 24,706                     | 8.61        | 2,259            | 12.94       | *        |
| Straight/Heterosexual            | 252,386                    | 87.94       | 14,406           | 82.51       | *        |
| Asian                            | 8,038                      | 2.80        | 81               | 0.46        | *        |
| Black/African American           | 57,177                     | 19.92       | 5,883            | 33.69       | *        |
| Hispanic or Latino/a/x           | 47,699                     | 16.62       | 2,668            | 15.28       | *        |
| MENA                             | 1,605                      | 0.56        | 50               | 0.29        | *        |
| Non-Hispanic White               | 150,402                    | 52.40       | 7,216            | 41.33       | *        |
| Native Hawaiian/Pacific Islander | 297                        | 0.10        | 23               | 0.13        | *        |
| Multiple race-ethnicities        | 10,771                     | 3.75        | 668              | 3.83        | *        |
| Other race-ethnicity not listed  | 3,017                      | 1.05        | 261              | 1.49        | *        |
| Born outside the US              | 43,635                     | 15.20       | 1,095            | 6.27        | *        |
| US-born                          | 238,162                    | 82.98       | 15,969           | 91.46       | *        |
| Less than high school            | 27,867                     | 9.71        | 3,417            | 19.57       | *        |
| High school diploma or GED       | 56,778                     | 19.78       | 5,822            | 33.34       | *        |
| Some college                     | 72,938                     | 25.41       | 4,771            | 27.33       | *        |
| College graduate                 | 62,550                     | 21.79       | 1,664            | 9.53        | *        |
| Advanced degree                  | 57,696                     | 20.10       | 922              | 5.28        | *        |

441  $p < .05$ , MENA = Middle East and North Africa

| <u>PGS</u> | <u>Phecode description</u>         | <u>HR</u> | <u>95% CI (lower)</u> | <u>95% CI (upper)</u> |
|------------|------------------------------------|-----------|-----------------------|-----------------------|
| SMOK       | Chronic airway obstruction         | 1.163     | 1.108                 | 1.220                 |
| PTSD       | Posttraumatic stress disorder      | 1.147     | 1.082                 | 1.217                 |
| SMOK       | Emphysema                          | 1.140     | 1.061                 | 1.226                 |
| SMOK       | Congestive heart failure (CHF) NOS | 1.140     | 1.070                 | 1.214                 |
| SMOK       | Obstructive chronic bronchitis     | 1.129     | 1.060                 | 1.204                 |
| SCZ        | Schizophrenia                      | 1.126     | 1.060                 | 1.195                 |
| SMOK       | Viral hepatitis C                  | 1.124     | 1.065                 | 1.186                 |
| SMOK       | Tobacco use disorder               | 1.116     | 1.086                 | 1.148                 |
| AUD        | Alcohol-related disorders          | 1.103     | 1.064                 | 1.142                 |
| SMOK       | Substance addiction and disorders  | 1.055     | 1.030                 | 1.081                 |
| AUD        | GERD                               | 0.937     | 0.910                 | 0.966                 |
| AUD        | Sepsis                             | 0.909     | 0.862                 | 0.959                 |
| AUD        | Inflammatory and toxic neuropathy  | 0.899     | 0.856                 | 0.945                 |
| SMOK       | Hypothyroidism NOS                 | 0.897     | 0.846                 | 0.951                 |
| SCZ        | Migraine                           | 0.896     | 0.852                 | 0.942                 |
| AUD        | Herpes zoster                      | 0.795     | 0.717                 | 0.881                 |
| AUD        | Glucocorticoid deficiency          | 0.790     | 0.693                 | 0.899                 |
| AUD        | Neutropenia                        | 0.747     | 0.639                 | 0.872                 |
| CUD        | Cystic mastopathy                  | 0.689     | 0.576                 | 0.825                 |

442 HR = hazard ratio; PGS = polygenic score; SMOK = ever smoker; PTSD = post-traumatic stress disorder;  
443 SCZ = schizophrenia; AUD alcohol use disorder; CUD = cannabis use disorder; NOS = . Not otherwise  
444 specified; GERD = Gastroesophageal reflux disease. Full results available in Supplementary Table S4.

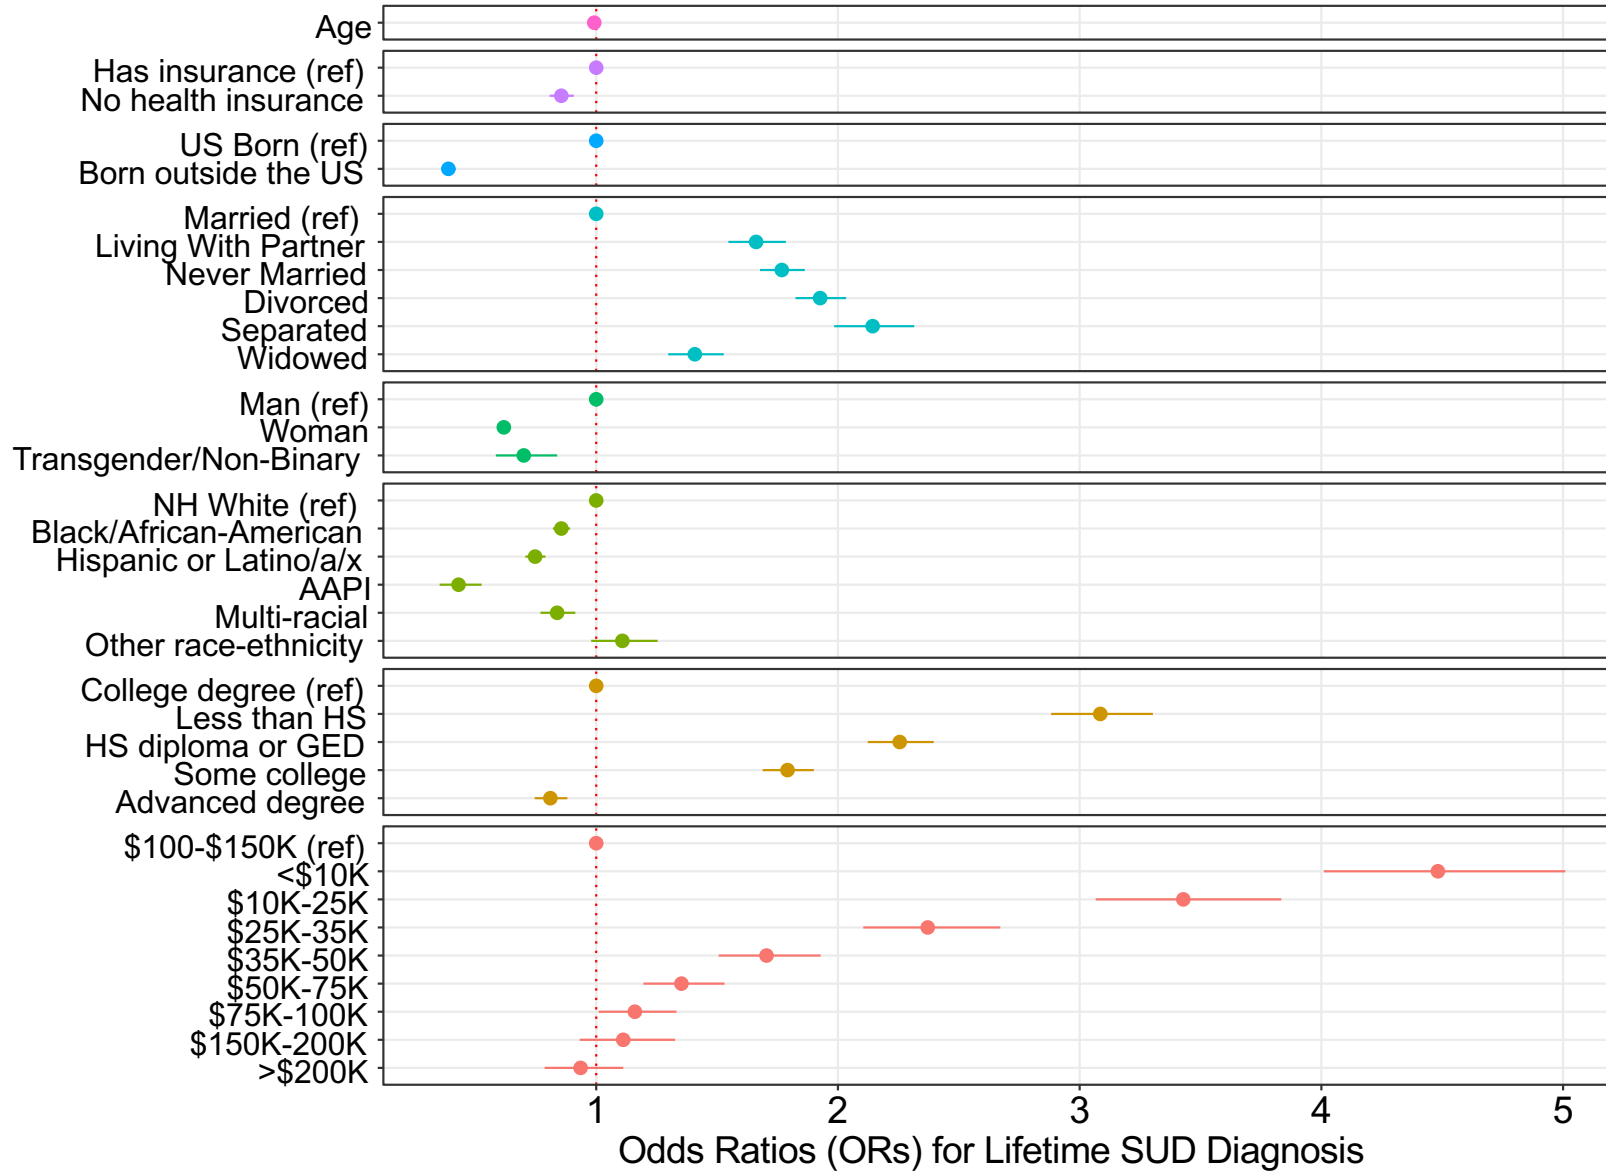

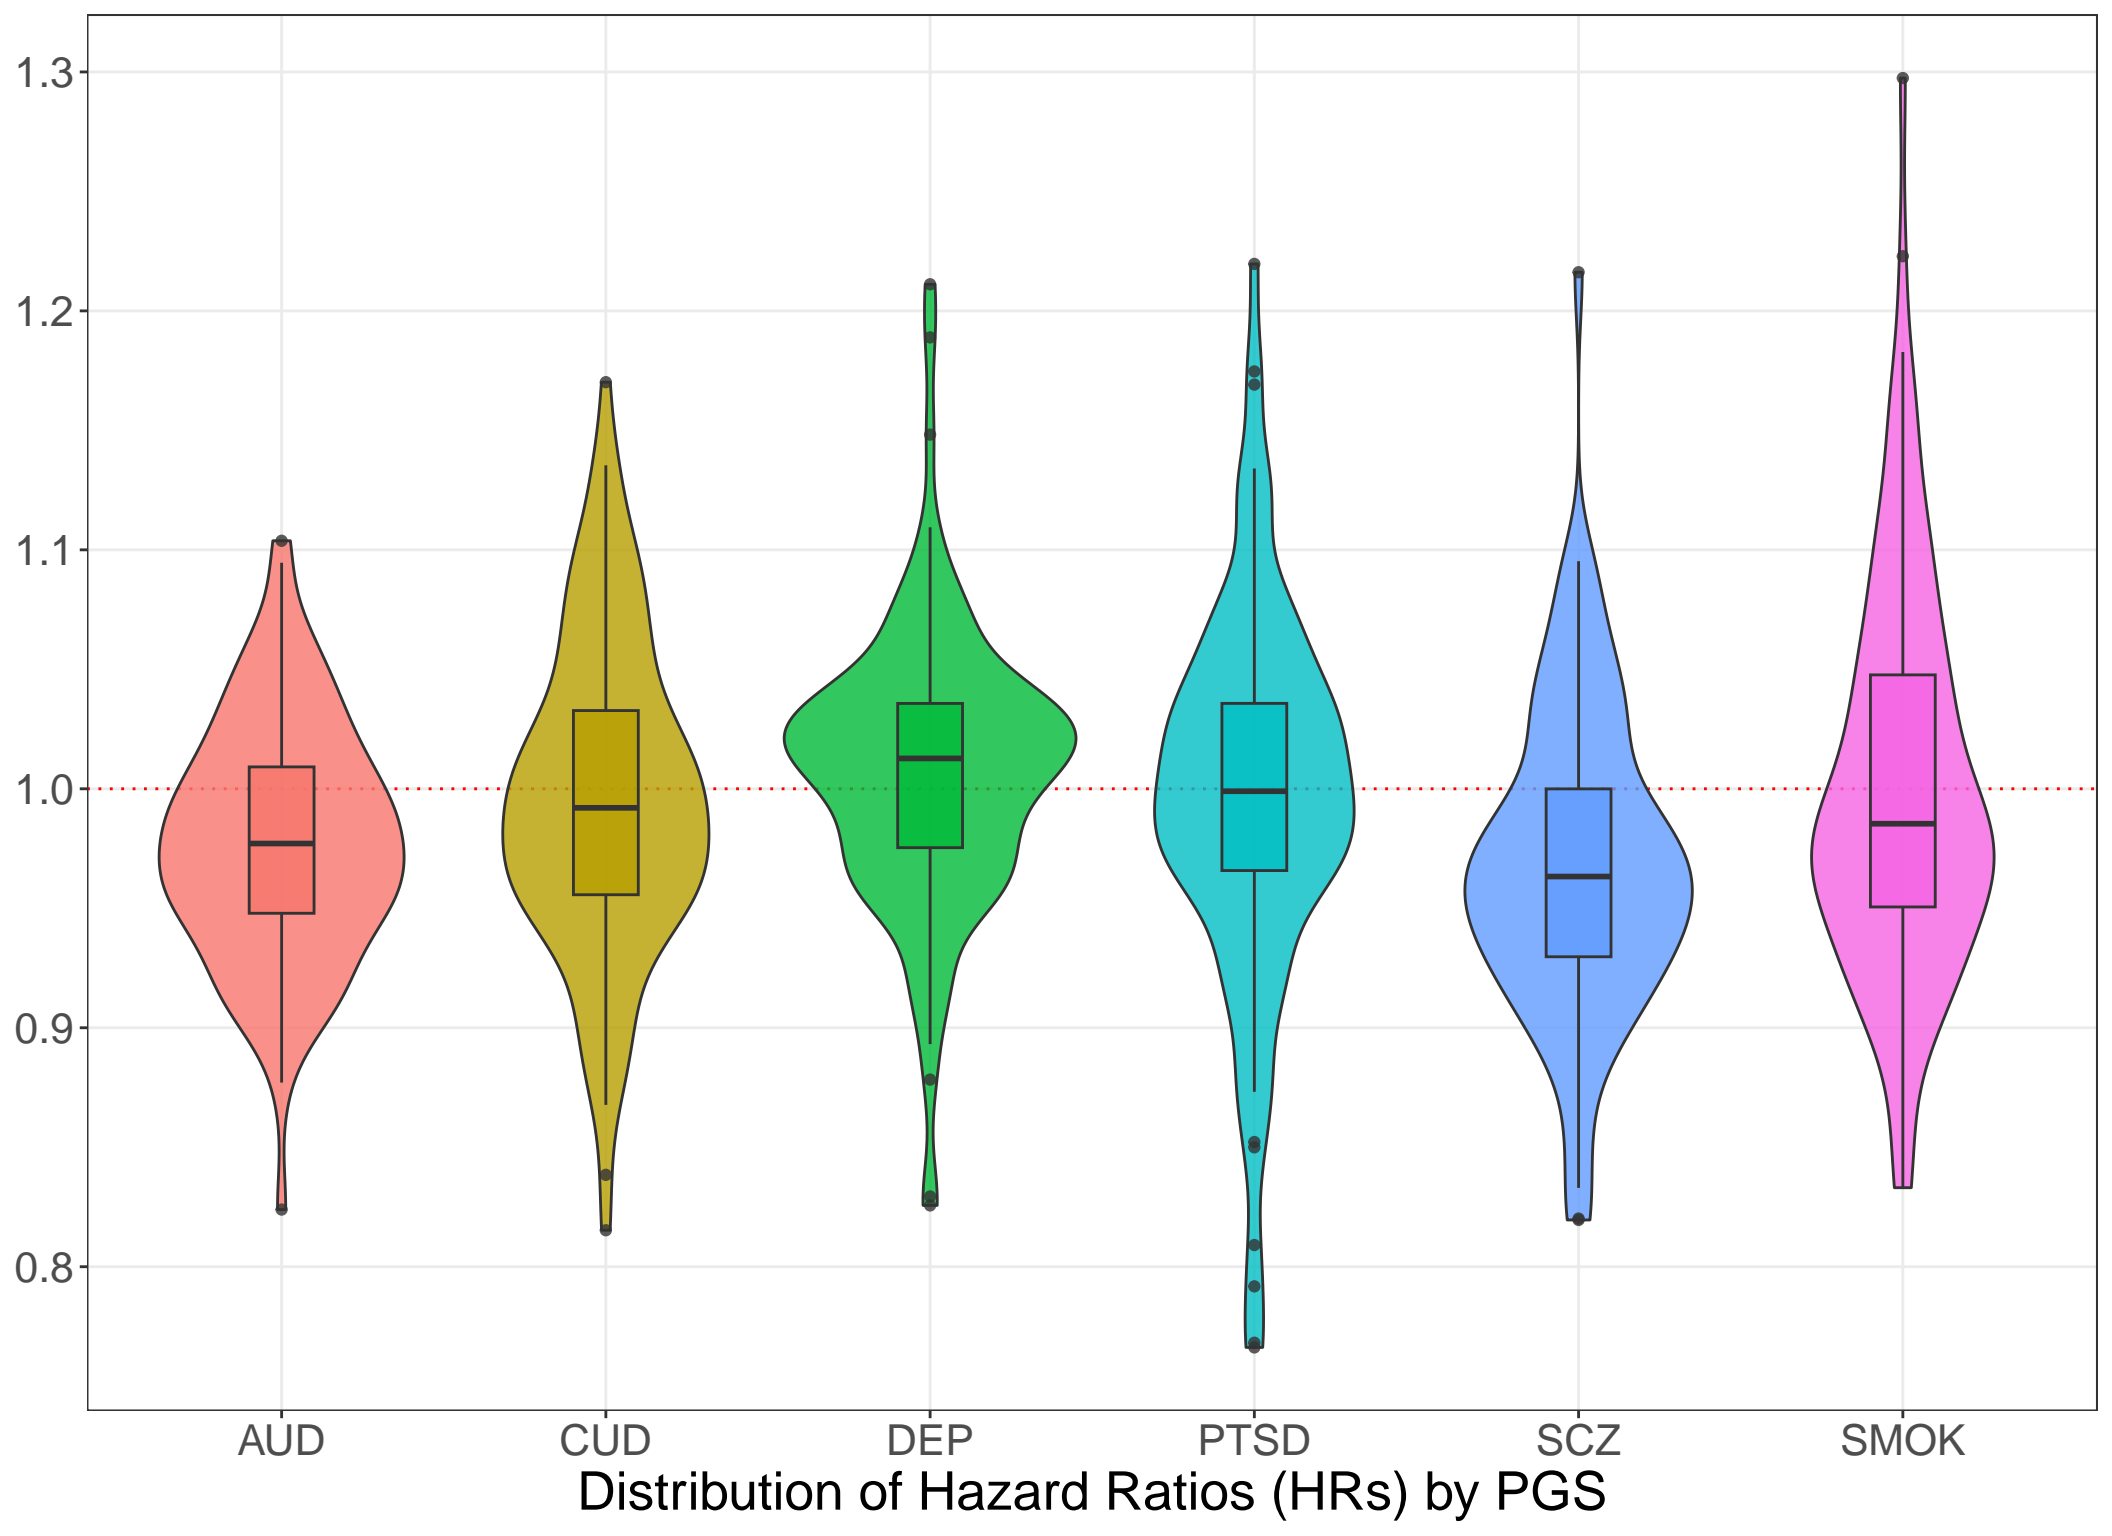



# Chronic Airway Obstruction

Survival time for Chronic airway obstruction by SMOK PGS

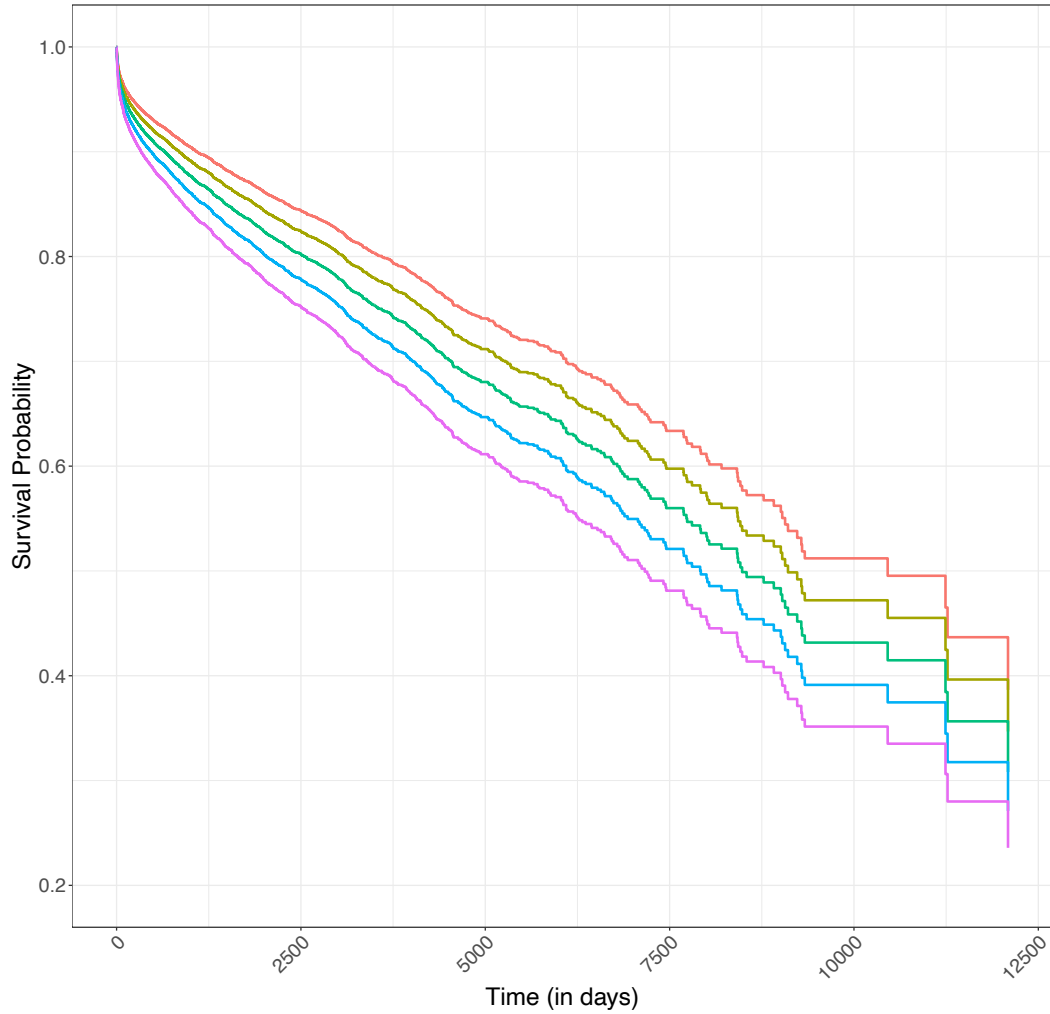

# Viral Hepatitis C

Survival time for Viral hepatitis C by SMOK PGS

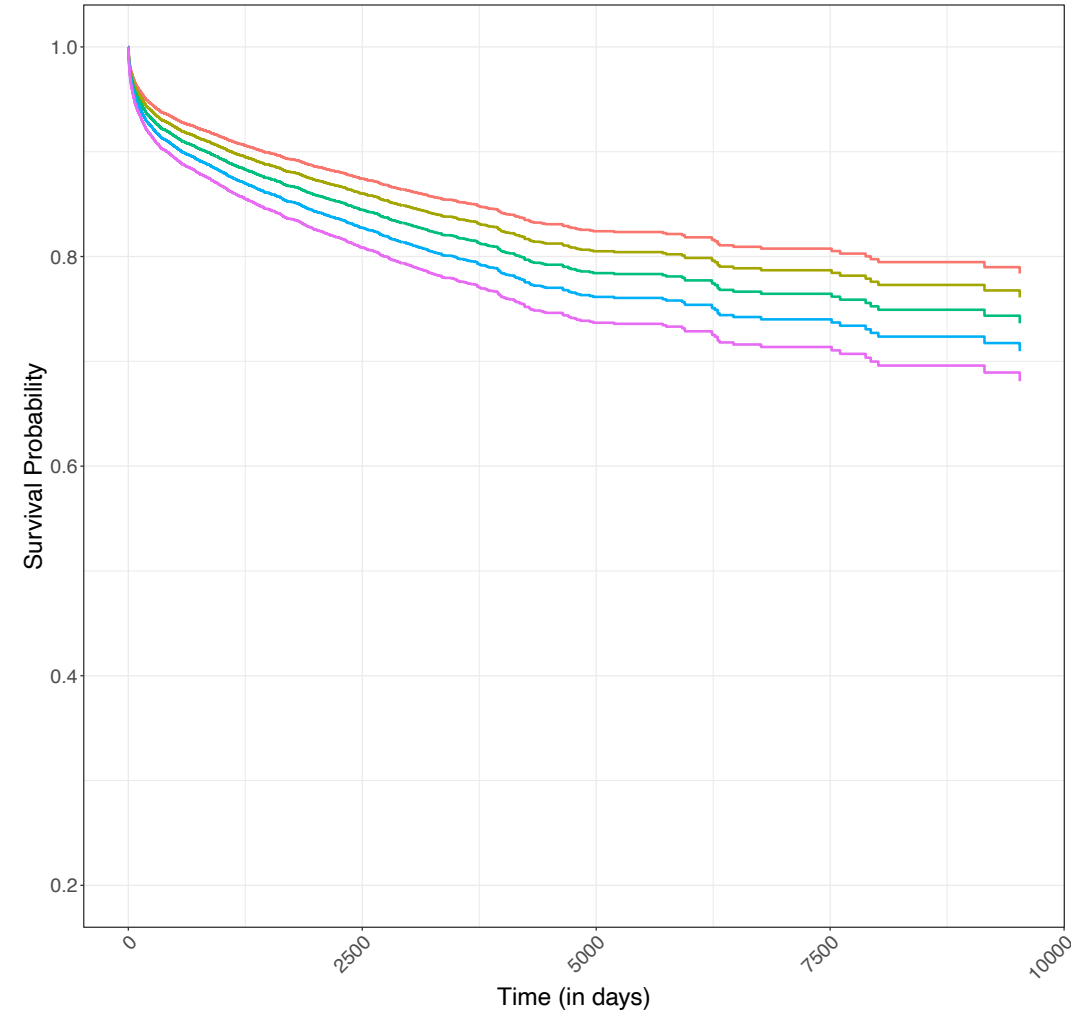

Source: https://medrxiv.org/content/10.1101/2024.12.13.24319000v1.full.pdf
